# Supplementary material for: Functional and structural properties of a novel cellulosome-like multienzyme complex: efficient glycoside hydrolysis of water-insoluble 7-xylosyl-10-deacetylpaclitaxel
Source: PubMed Central journal article supplement (PMC4562250; doi:10.1038/srep13768), 2015-09-08
Supplement: srep13768-s1.pdf [file srep13768-s1.pdf]

1 **Manuscript title:** Functional and Structural Properties of A Novel Cellulosome-like  
2 Multienzyme Complex: Efficient Glycoside Hydrolysis of Water-insoluble  
3 7-Xylosyl-10-deacetylpaclitaxel

4 **by:** Tong-Yi Dou, Hong-Wei Luan, Guang-Bo Ge, Ming-Ming Dong, Han-Fa Zou,  
5 Yu-Qi He, Pan Cui, Jia-Yue Wang, Da-Cheng Hao, Shi-Lin Yang, Ling Yang\*

6

7 **Supplementary Information**

8

9 Figure 1 Electrophoresis analysis of the purified enzymes

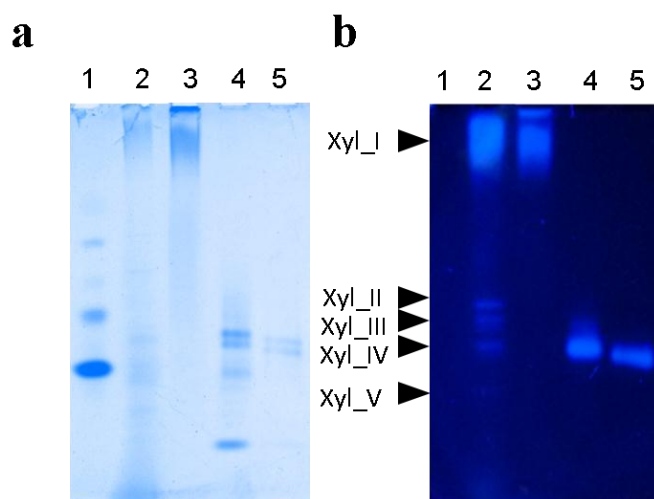

10

11 (a) 2%-15% continuous gradient Native PAGE, coomassie blue staining; (b)

12 Zymogram (MUX in situ staining) of (a); 1-BSA, BSA dimer, ferritin; 2-cell-free

13 culture supernatant; 3-the purified multienzyme complex Xyl\_I; 4-partly purified

14 active component Xyl\_IV; 5-the purified key catalytic subunit Xyl\_S

15

16 Figure 2 Chromatography for the isolation of active components

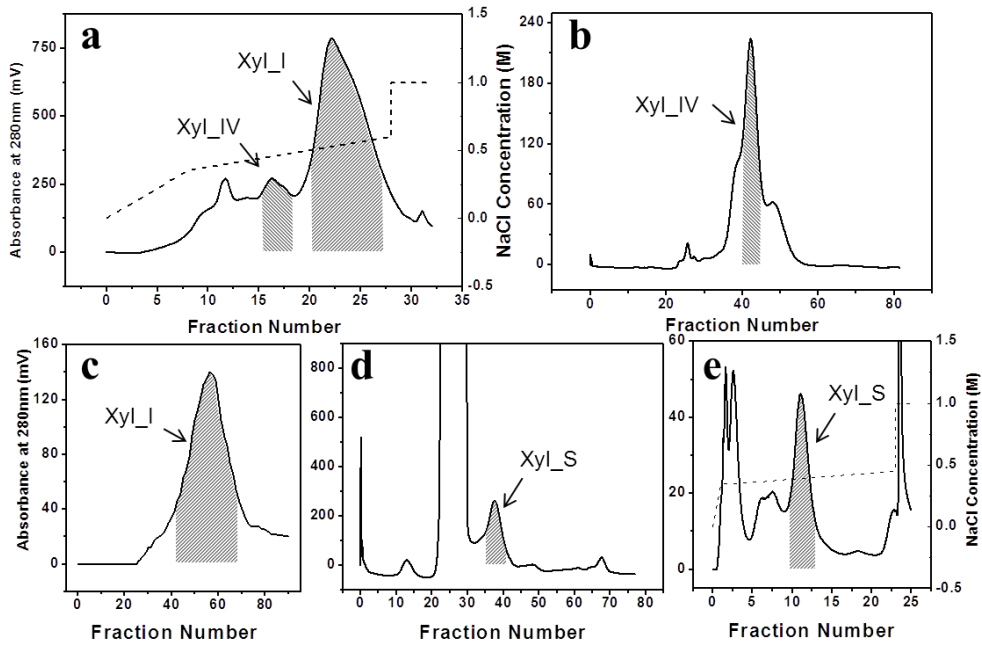

1  
 2 (a) Ion Exchange Chromatography by Source 15Q 11/80, Sample: Ammonium Sulfate  
 3 Precipitation Fraction 20%-40% (b) Gel Filtration Chromatography by Sephacryl  
 4 S-200 HR 17/750, Fractions containing Xyl\_IV; (c) Gel Filtration Chromatography  
 5 by Sephacryl S-1000 SF, Fractions containing Xyl\_I; (d) Gel Filtration  
 6 Chromatography by Sephacryl S-200 HR, Sample: partial digestion mixture of Xyl\_I;  
 7 (e) Ion Exchange Chromatography by Source 15Q 5/50, Sample: Fractions containing  
 8 Xyl\_S

9  
 10 Figure 3 Flow Chart of the overall purification strategy performed in this work

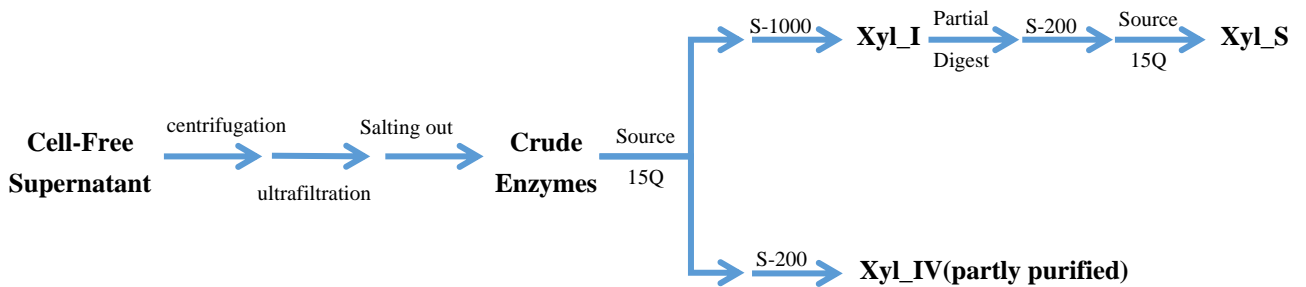

15

1 Figure 4 Molecule Size and Morphology Analysis of the Purified Enzymes

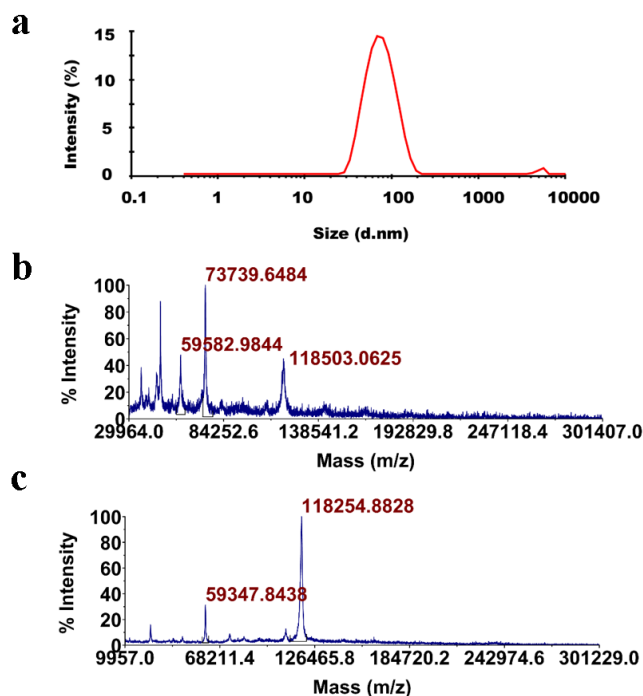

2

3 (a) Particle size distribution analysis of the purified multienzyme complex Xyl\_I, (b)

4 MALDI-TOF analysis of the partly purified active component Xyl\_IV, (c) MALDI-TOF

5 analysis of the purified subunit Xyl\_S

6

7 Table 1 Purification Summary

| Sample                                 | Total Volume /ml | Total Protein /mg | Total Activity /U | Specific Activity /mU/mg | Yield /% | Purification Fold |
|----------------------------------------|------------------|-------------------|-------------------|--------------------------|----------|-------------------|
| culture Supernatant                    | 13750            | 26538             | 129.3             | 4.9                      | 100      | 1                 |
| Ultrafiltration                        | 2000             | 9720              | 106.6             | 11                       | 82.4     | 2.3               |
| Ammonium Sulfate precipitation 20%-40% | 110              | 1487              | 17.5              | 11.8                     | 13.5     | 2.4               |
| Source 15Q (Xyl_I)                     | 1100             | 836               | 12.3              | 14.7                     | 9.5      | 3                 |
| Sephacryl S-1000 SF                    | 1680             | 605               | 9.6               | 15.8                     | 7.4      | 3.2               |
| Source 15Q (Xyl_IV)                    | 16               | 9.8               | 0.016             | 1.7                      | 100      | 1                 |
| Sephacryl S-200 HR                     | 2                | 0.1               | 0.001             | 8.3                      | 6.1      | 4.9               |
| Partial digestion mixture of Xyl_I     | 2                | 28.8              |                   |                          |          |                   |
| Sephacryl S-200 HR                     | 10               |                   |                   |                          |          |                   |
| Source 15Q (Xyl_S)                     | 20               | 3                 | 0.5               | 154.8                    | -        | 31.8              |

8

9

10 Table 2 Organic Solvent Tolerance

| Organic solvent | Log $P_{o/w}$ | IC <sub>10</sub> (%) |       | IC <sub>50</sub> (%) |            | 10-DAXP solubility at IC <sub>10</sub> (mg/ml) |             |
|-----------------|---------------|----------------------|-------|----------------------|------------|------------------------------------------------|-------------|
|                 |               | Xyl_I                | Xyl_S | Xyl_I                | Xyl_S      | for Xyl_I                                      | for Xyl_S   |
| water           |               |                      |       |                      |            | 0.02 ± 0.00                                    |             |
| DMSO            | -1.35         | 3.5                  | 7.5   | 17.9 ± 2.4           | 32.1 ± 3.7 | 0.68 ± 0.04                                    | 1.38 ± 0.03 |
| DMF             | -1            | 3.5                  | 9     | 18.7 ± 6.0           | 34.4 ± 4.7 | 0.71 ± 0.02                                    | 1.51 ± 0.01 |
| Methanol        | -0.76         | 9                    | 20    | 25.0 ± 1.4           | 42.8 ± 3.4 | 0.83 ± 0.01                                    | 1.60 ± 0.01 |
| Ethanol         | -0.24         | 13                   | 9     | 21.5 ± 3.9           | 36.9 ± 6.7 | 0.15 ± 0.00                                    | 0.09 ± 0.00 |
| Acetone         | -0.23         | 3                    | 3.7   | 12.7 ± 1.9           | 16.8 ± 1.7 | N.D.                                           | N.D.        |
| Ethyl acetate   | 0.73          | 13.3                 | 8     | 24.1                 | 36.5 ± 2.6 | 0.02 ± 0.00                                    | 0.02 ± 0.00 |
| 1-Butanol       | 0.8           | 11                   | 2.4   | 18.1 ± 3.6           | 24.2       | N.D.                                           | N.D.        |
| Benzene         | 2             | 6                    | 1.9   | 30.7 ± 5.0           | 46.6 ± 4.7 | N.D.                                           | N.D.        |
| Chloroform      | 2             | 11                   | 1.5   | 45.6 ± 7.6           | >100       | N.D.                                           | N.D.        |
| Octanol         | 3.15          | 7.5                  | 2     | 21.1 ± 1.7           | 76.8 ± 8.0 | N.D.                                           | N.D.        |
| n-Hexane        | 3.5           | >100                 | >100  | 17.9 ± 2.4           | 32.1 ± 3.7 | N.D.                                           | N.D.        |
| n-Heptane       | 3.5           | >100                 | >100  | 18.7 ± 6.0           | 34.4 ± 4.7 | N.D.                                           | N.D.        |
| n-Octane        | 4.5           | >100                 | >100  | 25.0 ± 1.4           | 42.8 ± 3.4 | N.D.                                           | N.D.        |

1

2

3 Table 3 Genome statistics

| Statistics                 |              |
|----------------------------|--------------|
| Num of Scaffold            | 14           |
| Total Length(bp)           | 4602907      |
| N50                        | 666262       |
| N90                        | 244600       |
| Max Length(bp)             | 1462680      |
| Max Length(bp)             | 515          |
| G+C Content(%)             | 74.4         |
| Predicted Coding Sequences | 4102         |
| tRNAs                      | 51           |
| rRNA operons               | 2 (16S, 23S) |
| GenBank Accession          | ATNL00000000 |
| Bioproject                 | PRJNA209578  |

4

5

1 Table 4 Proposed Subunits of Xyl\_I Identified by AB SCIEX Triple-TOF 5600

| N  | Accession of Proteins Identified | %Coverage(95) | Specific Peptide Identified | Molecular Weight/kDa | CAZy Families | Pfam domains                                                                 | signal peptide detected | Location    |
|----|----------------------------------|---------------|-----------------------------|----------------------|---------------|------------------------------------------------------------------------------|-------------------------|-------------|
| 1  | gnl PRJNA209578 M768_06655       | 89.7          | 1389                        | 175.258              | CBM6          | ThuA, GSDH, PKD , CBM_6                                                      | Sec                     | Scaffold2_1 |
| 2  | gnl PRJNA209578 M768_15610       | 61.6          | 135                         | 131.883              | CBM6          | GSDH , PKD , CBM_6 ,<br>AP_endonuc_2                                         | Sec                     | Scaffold6_1 |
| 3  | gnl PRJNA209578 M768_18415       | 63.5          | 145                         | 120.674              | GH43 CBM22    | Peptidase_S8                                                                 | Sec                     | Scaffold9_1 |
| 4  | gnl PRJNA209578 M768_11575       | 51.3          | 101                         | 114.821              | CBM32         | ThuA, F5_F8_type_C, GSDH, PKD,<br>DUF1080                                    | Sec                     | Scaffold3_1 |
| 5  | gnl PRJNA209578 M768_03010       | 48.1          | 99                          | 161.222              | CBM5          | LTD , Metallophos, Exo_endo_phos,<br>5_nucleotid_C                           | Sec                     | Scaffold1_1 |
| 6  | gnl PRJNA209578 M768_02340       | 39.5          | 107                         | 189.196              | GH92          | F5_F8_type_C , Glyco_hydro_92                                                | Tat                     | Scaffold1_1 |
| 7  | gnl PRJNA209578 M768_11580       | 54.3          | 93                          | 85.091               | CBM6          | CHB_HEX_C_1                                                                  | Sec                     | Scaffold3_1 |
| 8  | gnl PRJNA209578 M768_05900       | 29.3          | 46                          | 217.981              | CBM48 GH13    | Alpha-amylase, Alpha-amylase_C ,<br>CBM_48 , Alpha-amylase ,<br>DUF3372      | Tat                     | Scaffold1_1 |
| 9  | gnl PRJNA209578 M768_11760       | 58.5          | 52                          | 59.25                | CBM12         | PA , Peptidase_M28                                                           | Sec                     | Scaffold3_1 |
| 10 | gnl PRJNA209578 M768_10505       | 30.3          | 30                          | 118.833              | CBM35         | PA14 , CBM_6 , DUF1080                                                       | Tat                     | Scaffold3_1 |
| 11 | gnl PRJNA209578 M768_15505       | 35.2          | 23                          | 49.057               | CBM6          | ThuA                                                                         | Sec                     | Scaffold6_1 |
| 12 | gnl PRJNA209578 M768_00810       | 19.2          | 19                          | 126.632              | GH2           | PA14 , Glyco_hydro_2_N ,<br>Glyco_hydro_2 ,<br>Glyco_hydro_2_C , Laminin_G_3 | Sec                     | Scaffold1_1 |
| 13 | gnl PRJNA209578 M768_01395       | 25.9          | 33                          | 95.422               | GH92          | Glyco_hydro_92                                                               | Sec                     | Scaffold1_1 |

|    |                            |      |    |         |                     |                                                         |      |             |
|----|----------------------------|------|----|---------|---------------------|---------------------------------------------------------|------|-------------|
| 14 | gnl PRJNA209578 M768_08215 | 16   | 14 | 130.08  | CE4 CBM9 CBM22 GH10 | CBM_4_9 , Polysacc_deac_1 ,<br>Glyco_hydro_10 , DUF1083 | Sec  | Scaffold2_1 |
| 15 | gnl PRJNA209578 M768_11570 | 33.5 | 22 | 40.345  | AA1                 | Cu-oxidase_3 , Cu-oxidase_2                             | Tat  | Scaffold3_1 |
| 16 | gnl PRJNA209578 M768_00700 | 5.6  | 11 | 269.631 | N.D.                | —                                                       | Sec  | Scaffold1_1 |
| 17 | gnl PRJNA209578 M768_16095 | 17.4 | 10 | 74.749  | CBM6 GH92           | PAP2                                                    | Tat  | Scaffold7_1 |
| 18 | gnl PRJNA209578 M768_06610 | 2.7  | 5  | 198.125 | CBM6                | ThuA , GSDH , PKD , CBM_6                               | Sec  | Scaffold2_1 |
| 19 | gnl PRJNA209578 M768_13690 | 54.5 | 38 | 21.119  | CE1                 | —                                                       | Sec  | Scaffold5_1 |
| 20 | gnl PRJNA209578 M768_10165 | 19.1 | 6  | 38.576  | CBM32               | DUF1080                                                 | Sec  | Scaffold3_1 |
| 21 | gnl PRJNA209578 M768_04525 | 3.2  | 3  | 134.483 | GH51                | CBM_4_9 , Alpha-L-AF_C ,<br>Laminin_G_3                 | Sec  | Scaffold1_1 |
| 22 | gnl PRJNA209578 M768_02295 | 3.9  | 4  | 138.398 | CBM32               | F5_F8_type_C                                            | Tat  | Scaffold1_1 |
| 23 | gnl PRJNA209578 M768_10315 | 5.2  | 6  | 174.762 | CBM6 GH92           | Glyco_hydro_92 , CBM_6                                  | Sec  | Scaffold3_1 |
| 24 | gnl PRJNA209578 M768_04540 | 6.2  | 3  | 84.49   | CBM6 GH43 CBM22     | CBM_4_9 , Glyco_hydro_43 ,<br>CBM_6                     | Tat  | Scaffold1_1 |
| 25 | gnl PRJNA209578 M768_09190 | 12.8 | 6  | 58.944  | CBM32 GH81          | AP_endonuc_2 , F5_F8_type_C                             | Sec  | Scaffold2_1 |
| 26 | gnl PRJNA209578 M768_19580 | 11.2 | 2  | 30.654  | N.D.                | —                                                       | N.D. | Scaffold4_3 |
| 27 | gnl PRJNA209578 M768_04560 | 5.1  | 3  | 68.734  | GH121               | Big_4 , Big_3_4                                         | Tat  | Scaffold1_1 |

# 1 Supplementary Information II

## 2 Predicted Secondary Structure of the Hypothetic Protein M768\_06655

|                                      |                                      |
|--------------------------------------|--------------------------------------|
| Sequence length                      | 1642                                 |
| Secondary structure                  | Helix=3.9%, Strand=31.2%, Loop=64.9% |
|                                      |                                      |
| window size                          | 70                                   |
| Structure content cutoff             | 12%                                  |
| Minimum consecutive exposed residues | 10                                   |
|                                      |                                      |
| NORS                                 | N=NORS region                        |
| Secondary structure                  | H=helix, E=strand, '='=loop          |
| Coiled-coil region                   | c=coils                              |
| Transmembrane helix                  | m=transmembrane helix                |
| Solvent accessibility                | e=exposed, '='=buried                |

NORS region predicted: 398-472,482-621

|    |       |                                                    |
|----|-------|----------------------------------------------------|
| 4  |       | . : . : . : . : . : . 5                            |
| 5  | SEQ   | MAAATSATAATVPAGVAAAPVVTAADTEPFDVLVFSKTGGFRHGSIPAGI |
| 6  | NORS  |                                                    |
| 7  | SEC   | HHHHHHHHHHHHHHH EEEEEEE HHHH                       |
| 8  | COILS |                                                    |
| 9  | HTM   |                                                    |
| 10 | ACC   | eee eeeeeee e eee e e                              |
| 11 |       | . : . : . : . : . : . 10                           |
| 12 | SEQ   | AAIQKLGTEINFVTATEDAGAFDANLEQYDAVVWLSTTGDLNDDQQA    |
| 13 | NORS  |                                                    |
| 14 | SEC   | HHHHHHHHH EEEEE HHHHH EEEEE HHHHH                  |
| 15 | COILS |                                                    |
| 16 | HTM   |                                                    |
| 17 | ACC   | e ee eeee e e ee ee eee ee e eee ee                |
| 18 |       | . : . : . : . : . : . 15                           |

```

1 SEQ AFERYIQNGGGYAGIHAASDTEYDWPWYGGLVGAYFSAHPQNQTATVKVE
2 NORS
3 SEC HHHHHHHH EEEEE HHHHHHHH EE EEEEE
4 COILS
5 HTM
6 ACC ee e eee e ee e e e e
7 . : . : . : . : . 20
8 SEQ DHVHESTAHLPSRWERFDEWYNFRTNPRDTVHVLASLDETTYNAGSGAMG
9 NORS
10 SEC EEE EEEEE EEEEE
11 COILS
12 HTM
13 ACC eee ee ee e e eeeee eeee eeeeeeee
14 . : . : . : . : . 25
15 SEQ AEHPTAWCQVYDGGRSWYGGGHTDESYADPDFLQHLLGGIQTAAGAVAS
16 NORS
17 SEC EEEEE EEEEE HHHHHHHHHHHHEEE
18 COILS
19 HTM
20 ACC ee e ee ee ee e e e e e
21 . : . : . : . : . 30
22 SEQ DCAATQSASYEQIALDEETRNPMLDVADDGTVFYAERDGRVQVIDPSTN
23 NORS
24 SEC EEEEE EEEE EEEEE EEEEE
25 COILS
26 HTM
27 ACC e eeeeeee ee e eee e ee ee e e e e e
28 . : . : . : . : . 35
29 SEQ TTHTATTLPVTTANEDGLLGLVLDPAFSENGWVYTYWAPANVGS DGPHNR
30 NORS

```





```

1 HTM
2 ACC e e e ee e e e e e e e e e e e e e e
3 . : . : . : . : . 60
4 SEQ CDAGPVNQSPNNTGLTQLPPAIEAEIWIYNYAGNPDFPEIGGGGAPMGGPV
5 NORS NNNNNNNNNNNNNNNNNNNNNNNNNNNNNNNNNNNNNNNNNNNNNNNNNNNNNNNNNNN
6 SEC EEEE E
7 COILS
8 HTM
9 ACC e e e e e e e e ee e e e e e e e e e e e e e e
10 . : . : . : . : . 65
11 SEQ YQFDPELDSDVQWPEYWDGKAFLEWNGKLYSIQLEGENRDDIVDINRV
12 NORS NNNNNNNNNNNNNNNNNNNNNNNNNNNNNNNNNNNNNNNNNNNNNNNNNNNNNNNNNNN
13 SEC EE EEEEE EEEEE EEEEE
14 COILS
15 HTM
16 ACC e e e e e e e e ee e e e e e e e e e e e e e e e e e
17 . : . : . : . : . 70
18 SEQ MPKIFDPSAGFDRAMDFDFGPDGALYVVDWGSFGGDNDSSGVYKVNYVK
19 NORS
20 SEC EEE EEEEE EEEEE
21 COILS
22 HTM
23 ACC e e e e ee e ee e e e e e e e e e e e e e e e e e e e
24 . : . : . : . : . 75
25 SEQ GNPSPFIARASADVTSGHAPLTVQFSSEGTRHPAGDELTLQWTFGDGSEPS
26 NORS
27 SEC EEE EEEEE EEEEE
28 COILS
29 HTM
30 ACC ee e e e e e e e e e e e e e e e e e e e e e e e e e e e e

```

```

1      . : . : . : . : . 80
2 SEQ  TEANPVHTYTENGSYTAQLVATDAQGQTGVANVSVVVGNDAPTISITFPD
3 NORS
4 SEC      EEEE  EEEEEEEEE  EEEEEEEEE  EEEEE
5 COILS
6 HTM
7 ACC  ee e e  eee e  e  e eeeee  e  ee
8      . : . : . : . : . 85
9 SEQ  NGGFFQWGDQVRYEIAVDDPDGEVDCSQVELSTSLGHDSHAHPMDVLGGC
10 NORS
11 SEC     EEE  EEEEEEEEE  EEEEEEEEE
12 COILS
13 HTM
14 ACC  ee  e eee e e e e eeee e e e  e e
15      . : . : . : . : . 90
16 SEQ  EGVFQTARDEGHGIESNIFWVIEASYTDDGGAAGAPLTANDLQVLQPKLL
17 NORS
18 SEC     EEE  EEEEEEEEE
19 COILS
20 HTM
21 ACC  e  e e eeeee  e eeee ee e  ee e  ee e
22      . : . : . : . : . 95
23 SEQ  QAEFFTSTGRLADSTSTGDPGVQRETTSDTAGGGQNIGYIEPGDWWAYDP
24 NORS
25 SEC     EEEE  EEEE  EEE
26 COILS
27 HTM
28 ACC  e e  e ee eeeeeeee e eee eeee eeee e e ee  e
29      . : . : . : . : . 100
30 SEQ  ISLYGVDSIALRAASPSNATISIRWNAADGPEIGTVQVPGTGDWQVYQNV

```

```

1 NORS
2 SEC      EEEEEEE   EEEEEEE   EEEEE   EEE
3 COILS
4 HTM
5 ACC      e e e     ee  e e e eeeee   e e e eee
6          . : . : . : . : . 105
7 SEQ      SSTLTDVPSGTGLTYFVLTSQANVNWLEFDGRGVTDNERPTIDSFEVTP
8 NORS
9 SEC      EE       EEEEEEE   EEEEE
10 COILS
11 HTM
12 ACC     e e ee ee     e e e e ee e eeeeeeeeeee e e
13         . : . : . : . : . 110
14 SEQ      TTGTAPLKVTATATASDPEDDAITFAWDAGLGDGFVDGTDSFEVTYDQPG
15 NORS
16 SEC      EEEEEEE   EEEEEEE   EEEEE
17 COILS
18 HTM
19 ACC     e ee e e     eeeeeee   e e e ee e e e
20         . : . : . : . : . 115
21 SEQ      TYRLQVRASDERGAYSVEYTTVTVKASQTGPGMCFSGRSDDFLGTDLDEN
22 NORS
23 SEC     EEEEEEEEE   EEEEEEEEE   EEE
24 COILS
25 HTM
26 ACC          e  eee e e     e ee     e ee e e eee
27         . : . : . : . : . 120
28 SEQ      RWSVLNRDQNLVVRDGNLVIPTTATDFYSTDNTTVPNMVLQDLPDGPFTA
29 NORS
30 SEC     EE       EEE   EEEEE           EEEEE   EEE

```

```

1 COILS
2 HTM
3 ACC  e e  ee e  ee      e      e e
4      . : . : . : . : . 125
5 SEQ  TAKLTLPARQQYQQAGLVIWEDQDNYAKMVLQGRSAAADPATRIFQFIRE
6 NORS
7 SEC  EEEEE  EEEE  EEEEE  EEEEE
8 COILS
9 HTM
10 ACC  e e e  eeeee e  ee      ee
11     . : . : . : . : . 130
12 SEQ  ENAAPNEVNESNSAALGAAYPDTVYVRFVSNGENLQAAYSADGIDFTTMP
13 NORS
14 SEC  EEEEE  EEEEE  EEE
15 COILS
16 HTM
17 ACC  ee e ee eee      ee ee  e e
18     . : . : . : . : . 135
19 SEQ  QTKSIADLENAKIGLVSFKGNNTASPVIEAAFDWFSITPDDTASAPGDD
20 NORS
21 SEC  EEEEE  EEEEEEEEE
22 COILS
23 HTM
24 ACC  e e ee e  e e      e e  ee e ee ee
25     . : . : . : . : . 140
26 SEQ  EFDGTALDACRWSIVREDPTGYRVADGSLQIDTTPTDIYGTDNRPVNPVIV
27 NORS
28 SEC  EEEEE  EEEE  EEEEE  EE
29 COILS
30 HTM

```

```

1 ACC  e e  e e e  eee e  e  e e  e  e e
2      .  :  .  :  .  :  .  :  .  145
3 SEQ  LQDQPGEETIETVVDGSAIDRQYQQGLIVYGDDDNVVKLDYVVDNQAG
4 NORS
5 SEC  EE      EEEEEEEE      EEEEE  EEEEEEE
6 COILS
7 HTM
8 ACC  e e e  e  ee e  eeee e e  eee e
9      .  :  .  :  .  :  .  :  .  150
10 SEQ  QAKNARIELRSEVAGVVQNPQPQSSSLTGDVWHLRLTRSGDTFTGEYSAD
11 NORS
12 SEC      EEEEE      EEEEEEE  EEE
13 COILS
14 HTM
15 ACC  e e  e e  e e  e  e  e
16      .  :  .  :  .  :  .  :  .  155
17 SEQ  GETWTTFDQSVTNAPASGAQVGLFALGASADTGAPASFGHFRVVGDEVPE
18 NORS
19 SEC      EEEEEEE      EEEEEEE
20 COILS
21 HTM
22 ACC  ee  e  ee e  e e  e  eee e
23      .  :  .  :  .  :  .  :  .  160
24 SEQ  IAVTITAETRCMAGKVFVAVRATNDDAVPVAITLETYPYGSKEFADVAPGA
25 NORS
26 SEC      EEEEEEE      EEEEEEE  EEEEEEE
27 COILS
28 HTM
29 ACC      e  e  eeee e  eeeee
30      .  :  .  :  .  :  .  :  .  165

```

```

1 SEQ  NAYQSFASRAVGIDAGSVTVTATDAEGRTFSGTADYAARACS
2 NORS
3 SEC   EEE           EEEEEEE           EEEEE
4 COILS
5 HTM
6 ACC   e           e  eeee           eeeee e           eeee
7 //

```

8

9 Predicted by: Reference:

10

- 11 1. **PredictProtein**: B Rost,G Yachdav and J Liu (2004) The PredictProtein Server. Nucleic Acids  
12 Research 32(Web Server issue):W321-W326.
- 13 ○ Author: B Rost
  - 14 ○ Contact: help@predictprotein.org
  - 15 ○ URL: [PredictProtein Homepage](#)
  - 16 ○ Description: PredictProtein is the acronym for all prediction programs run.
- 17 2. **PROFphd**: B Rost (1996) Methods in Enzymology, 266:525-539
- 18 ○ Author: B Rost
  - 19 ○ Description: PROF is a suite of programs predicting 1D structure (secondary structure, solvent  
20 accessibility) from multiple sequence alignments.PHDhtm predicts the location and topology of  
21 transmembrane helices from multiple sequence alignments.
  - 22 ○ URL: [PROFphd Information Page](#)
- 23 3. **NORS**: Liu J, Rost B (2003) NORSp: predictions of long regions without regular secondary  
24 structure. Nucleic Acids Research 31(13):3833-3835
- 25 ○ Author: J. Liu
  - 26 ○ URL: [NORSp Information Page](#)
  - 27 ○ Description: NORSp is a predictor of NON-Regular Secondary Structure.
